# Supplementary material for: Low-cost, sub-micron resolution, wide-field computational microscopy using opensource hardware
Source: PubMed Central journal article supplement (PMC6520337; doi:10.1038/s41598-019-43845-9), 2019-05-15
Supplement: 41598_2019_43845_MOESM1_ESM.pdf [file 41598_2019_43845_MOESM1_ESM.pdf]

1 Low-cost, sub-micron resolution, wide-  
2 field computational microscopy using  
3 opensource hardware  
4

5 **TOMAS AIDUKAS<sup>1</sup>, REGINA ECKERT<sup>2</sup>, ANDREW R. HARVEY<sup>1\*</sup>,**  
6 **LAURA WALLER<sup>2</sup>, PAVAN C. KONDA<sup>1</sup>**

7 <sup>1</sup> *Imaging Concepts Group, School of Physics and Astronomy, University of Glasgow, Scotland, G12 8QQ, UK*

8 <sup>2</sup> *Department of Electrical Engineering and Computer Sciences, University of California, Berkeley, California*  
9 *94720, USA*

10 [\\*Andy.Harvey@glasgow.ac.uk](mailto:Andy.Harvey@glasgow.ac.uk)

11  
12  
13  
14  
15  
16  
17  
18  
19  
20  
21  
22  
23  
24  
25  
26  
27  
28

# 29 Supplementary material 1: 30 Instructions to build a *Raspberry Pi* 31 Fourier ptychographic computational 32 microscope

33 This document provides instructions to build a low-cost computational microscope  
34 reported in the manuscript: “*Low-cost, sub-micron resolution, wide-field computational*  
35 *microscopy using opensource hardware*”. The CAD files and data acquisition codes  
36 can be downloaded from <http://dx.doi.org/10.5525/gla.researchdata.594>.

## 37 Introduction

38 One of the aims when building this microscope was to use only off-the-shelf  
39 components that can be easily bought anywhere and to design the microscope in such  
40 a way that it could be assembled with minimal external components. Avoiding  
41 complexity allowed us to build a very low-cost and robust microscope, which can be  
42 assembled and used with opensource software. Designs for the parts were made  
43 using *OpenSCAD* open source CAD software and printed with *Ultimaker 2+* 3D printer.

44 The microscope was designed around the [Raspberry Pi 3](#) computer board due  
45 to a wide opensource community and the support available. The computer itself has a  
46 CSI port to which a [Raspberry Pi camera](#) can be connected. For the illumination we  
47 used a [Unicorn HAT HD](#) 16x16 LED array, which is an add-on designed for the  
48 *Raspberry Pi* boards. It mounts directly onto the GPIO pins on top of the board.  
49 Camera and the LED board can be connected and controlled easily via opensource  
50 libraries available for *Python* or C++ programming languages.

51 Furthermore, *Raspberry Pi* camera comes mounted with a mobile-phone-camera  
52 type lens. It was unscrewed from the camera and used as our microscope objective.  
53 The component list required to build the setup is provided below, along with a step-  
54 by-step instruction set for assembly and operation of the microscope.

55

56 **Component list**

| <b>Off-the-shelf components</b>                                                                                                        | <b>Quantity</b> | <b>Purpose</b>                                                     | <b>Suppliers and manufacturers</b>              |
|----------------------------------------------------------------------------------------------------------------------------------------|-----------------|--------------------------------------------------------------------|-------------------------------------------------|
| Raspberry Pi 3 computer board (~\$32)                                                                                                  | 1               | Controlling the camera and LED array; image capture and storage    | Multiple suppliers (e.g. Pimoroni, Farnell, RS) |
| 20mm long M3 screws (unit price of ~\$0.05)                                                                                            | 4               | Fix Raspberry Pi computer board to a stable base                   | Multiple suppliers (e.g. RS)                    |
| Unicorn HAT HD 16x16 LED array (~\$30)                                                                                                 | 1               | Illumination source                                                | Pimoroni                                        |
| Raspberry Pi V2.1 NoIR camera (~\$20)                                                                                                  | 1               | Image sensor                                                       | Multiple suppliers (e.g. Pimoroni, PiHut)       |
| Unscrewed lens from the Raspberry Pi camera (Part 4)                                                                                   | 1               | Microscope objective                                               |                                                 |
| 3.5mm diameter, >10mm long, 0.25mm pitch screw and bushing (Thorlabs F3ES25, F3ESN1P) (~\$7, could use a regular screw to reduce cost) | 1               | Used for high-accuracy focusing                                    | Thorlabs                                        |
| >40mm long M6 screws + nuts (unit price of ~\$0.05)                                                                                    | 2               | Attaching the focusing stage to the sample stage                   | Multiple suppliers (e.g. RS)                    |
| 5.6mm diameter, ~10mm long springs ( <u>RS Stock No. 821-431</u> ) (~\$1, or any other stiff spring)                                   | 2               | Counter balance force for the focusing stage                       | Multiple suppliers (e.g. RS)                    |
| 5mm long M1.5 screws (unit price of ~\$0.05)                                                                                           | 4               | Screwing <i>Raspberry Pi</i> (part 4) camera to the focusing stage | Multiple suppliers (e.g. RS)                    |

57 Supplementary Table S1 1. List of the off-the-shelf components required to build the  
58 microscope. Several links for the products are provided at the end of the document.

59

60

61

## 62 Design

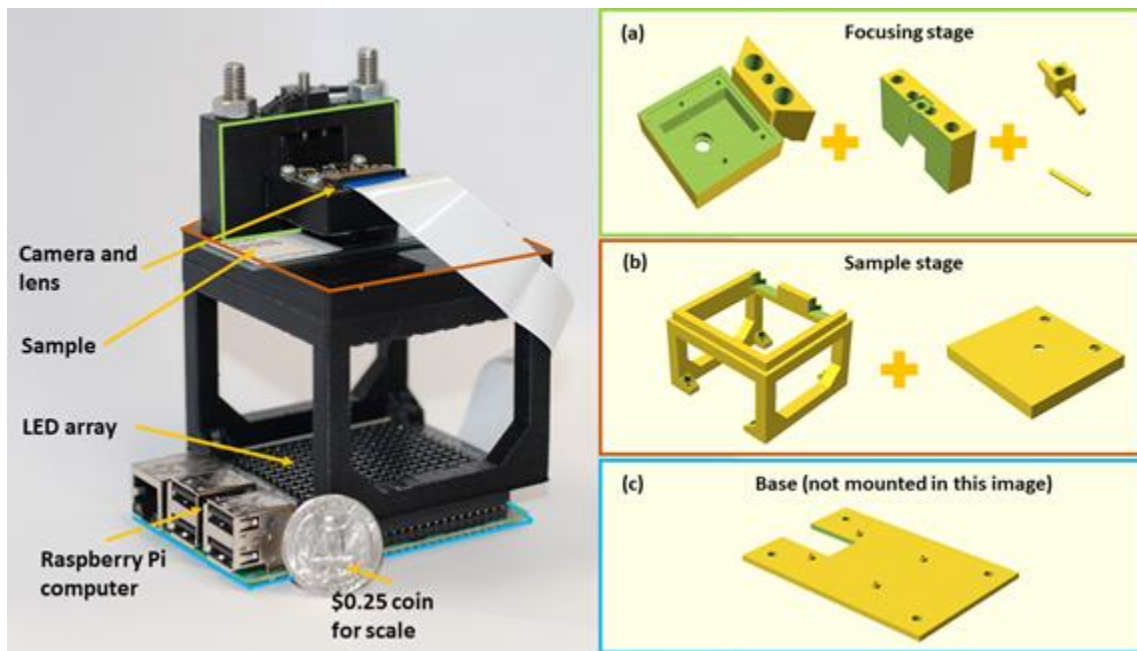

63

64 Supplementary Figure S1 1. The experimental setup with all the necessary annotations for  
65 reference to 3D printed designs.

66 Supplementary Figure S1 1 shows the assembled setup together with 3D printed parts  
67 required. It was built using components described in Supplementary Table S1 1. Once  
68 each component is 3D printed, the assembly is very simple and requires only a few  
69 screwdrivers.

### 70 Base

71 The plastic base shown in Supplementary Figure S1 1(c) was printed such that the  
72 Raspberry pi and the sample stage could be screwed onto it. The base itself has 4  
73 holes which can be used for screwing the microscopes to the optical bench if needed.  
74 This was designed to provide higher stability when longitudinal imaging might be  
75 required.

### 76 Sample stage

77 The sample stage shown in Supplementary Figure S1 1(b) was designed to be  
78 mounted on the Raspberry Pi board with an LED array on top. The four screw holes  
79 on the 3D printed sample stage match those found on the Raspberry Pi and the plastic  
80 base. All components can be screwed tightly together to form a single microscope unit.

81 There is another 3D printed part that goes on top of the sample stage. It has  
82 3 holes on it where the central one acts as an aperture for the sample, reducing any  
83 stray light and reflections from the LED array. The other 2 holes were made for screws  
84 that attach the focusing stage to the sample stage.

### 85 Camera holder and focusing stage

86 The focusing stage shown in Supplementary Figure S1 1(a) is composed of four 3D  
87 printed elements.

88 The camera holder module (the first 3D printed part seen in Supplementary Figure  
89 S1 1(a)) was designed to mount the microscope objective (the unscrewed camera  
90 lens) in place and screw the camera above it. This was designed for finite-conjugate  
91 microscope configuration to be established. The unscrewed lens from the camera has  
92 a 1.5mm aperture only on one side; lens must be mounted such that the aperture is  
93 facing downwards (towards the sample). This compact design was set to achieve 1.5x  
94 magnification, but it can be easily modified by changing the distance between the lens  
95 and the detector. It should be noted that the sensor is not glued to the camera board  
96 well. To ensure correct alignment it is best to re-glue the sensor.

97 The camera holder mount, (the second 3D printed part seen in Supplementary  
98 Figure S1 1(a)) serves several purposes including focusing the sample. Firstly, it has  
99 rails onto which camera holder module is mounted and can be moved up or down for  
100 focusing. The central hole in the camera holder mount is for the 0.25mm pitch screw.  
101 Springs are fed through the inner pair of holes in the camera holder mount and the  
102 corresponding holes in the camera holder module. They are held in place by sliding  
103 the pins shown in Supplementary Figure S1 1(a) through each end of both springs.  
104 The screw is used to push down on the camera holder module while the springs and  
105 bottom pin provide a counter force to push it upwards. This way the module can slide  
106 along the rails with high-precision, by turning the screw. Springs provide stability and  
107 push the module upwards when the screw does not provide a downward force  
108 anymore, which should minimize the backlash error.

109 Secondly, the outer holes in the camera holder mount enables addition of screws  
110 or bolts to attach the whole focusing module to the top of the sample stage. While the  
111 focusing is done via a translation stage, the sample must be translated by hand. In our  
112 setup, the FOV is large so precise translation is not required; hence, we chose to use  
113 this design. However, there are 3D printed sample translation stages available in the  
114 opensource community that can be integrated into our design.

## 115 **Assembly instructions**

116 Access to a 3D printer is required to print several parts required for the assembly. We  
117 used *Ultimaker 2+* with a nozzle size of 0.25mm for the camera holder module and  
118 0.4mm for the other components. Also, the lens from the *Raspberry Pi V2.0* camera  
119 must be unscrewed before the assembly. Step-by-step instructions to assemble the  
120 microscope:

- 121 1. 3D print all the parts using a printer of your choice. We used *openSCAD* to  
122 design, render and save the designs in .STL format. *CURA* software was used  
123 to create the files that can be read by the *Ultimaker 2+* 3D printer. Black PLA  
124 filament and a 0.4mm diameter nozzle was used for printing the sample stage  
125 parts, while a 0.25mm nozzle was used to print the focusing stage. Our files  
126 were designed to match the tolerance of the nozzles on our printer. The 3D  
127 models need to be tweaked when a different nozzle size or a different 3D  
128 printer is used due to change in the tolerances.
- 129 2. Connect the *Raspberry Pi* camera to the *Raspberry Pi* board.

130

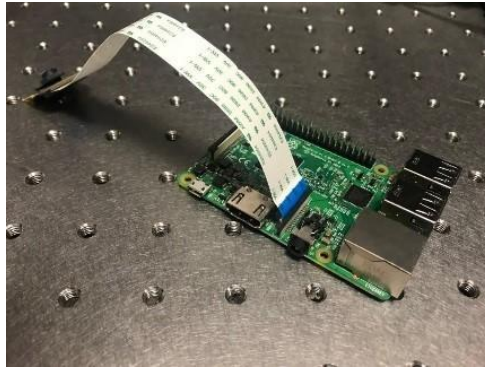

131

3. Mount the LED array on top of the Raspberry Pi board by plugging it into the GPIO pins on the board.

132

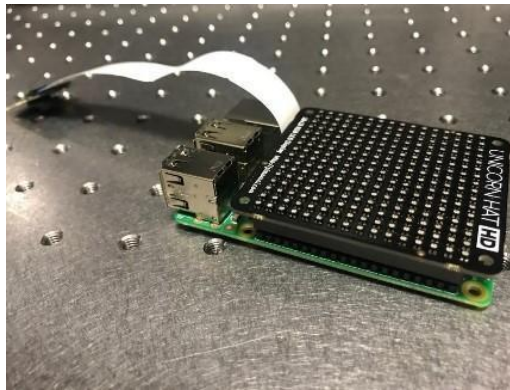

133

134

4. Place the sample stage such that the screw holes match the base; making sure that the sample-stage feet are not on top of any of the LEDs. Then place a nut in each foot of the sample stage.

135

136

137

5. Place the spacers in between the *Raspberry Pi* board UnicornhatHD board so that they are aligned with the screw holes and then screw the *Raspberry Pi* board and the sample stage to the base such that they form a single rigid module.

138

139

140

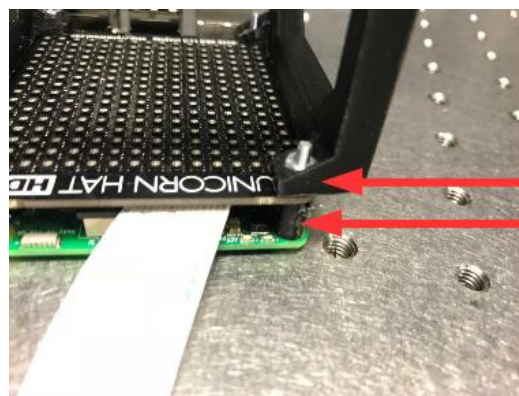

Sample Stage Foot  
Spacer

141

142

6. Take the camera holder; place the lens in the circular slot with the aperture facing downwards, towards the sample stage.

143



144  
145  
146

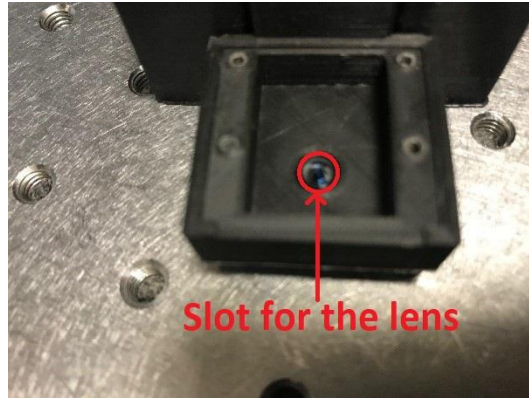

7. Mount the camera, align with the screw holes of the 3D printed camera holder; screw it in place tightly.

147  
148  
149  
150  
151  
152  
153

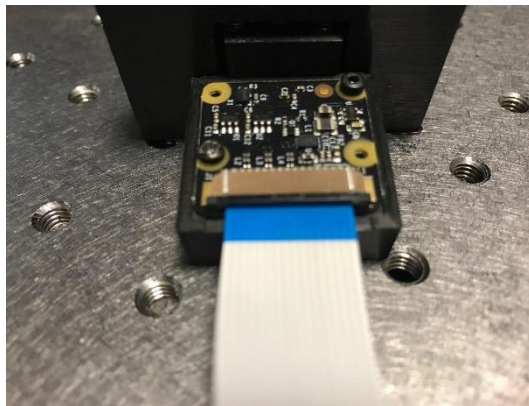

8. Slide the camera holder module onto the focusing stage rails. Thread the springs through the holes on the focusing stage and the camera module as shown by a red arrow in the figure below. Use two 3D printed horizontal pins seen in Supplementary Figure S1 1(a) to hold the ends of the springs at the top and bottom of the focusing stage; the spring should be long enough such that it is stretched out and apply a strong counter-balance force to the screw.

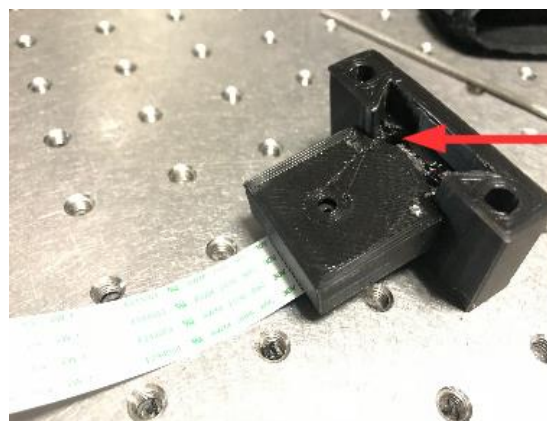

Hole for Spring

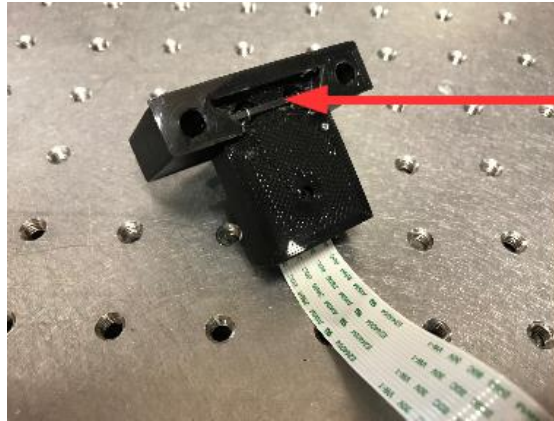

Bottom Pin

154

155

156

157

158

9. Pull down the camera holder module and, from underneath, place the bushing up into the central hole of the focusing stage. Then, place the screw in the top of the camera holder mount. Screw it in such that the screw pushes onto the camera holder module.

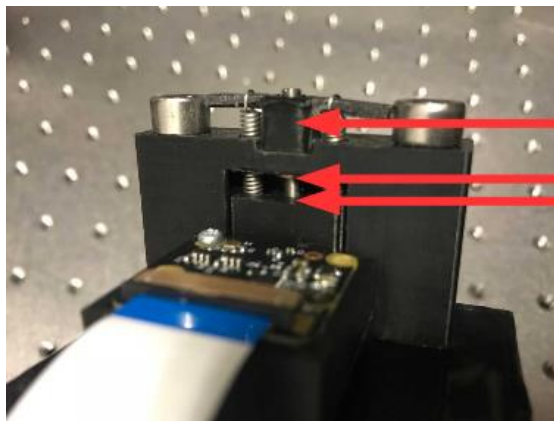

Top Pin

Bushing  
Screw

159

160

161

162

163

164

165

166

167

168

169

170

10. Use screws with nuts to fix the focusing stage tightly to the top plate of the sample stage from Supplementary Figure S1 1(b)).
11. Place the focusing stage module onto the sample stage module with the *Raspberry Pi* computer. The part is designed to have a tight fit, if it is not tight, please adjust the tolerances.
12. Optional: connect a screen using the HDMI port.
13. Optional: connect a keyboard and a mouse.
14. Optional: Place the *Raspberry Pi* board on top of the 3D printed base; align the base and the *Raspberry Pi* such that the screw holes are on top of each other.



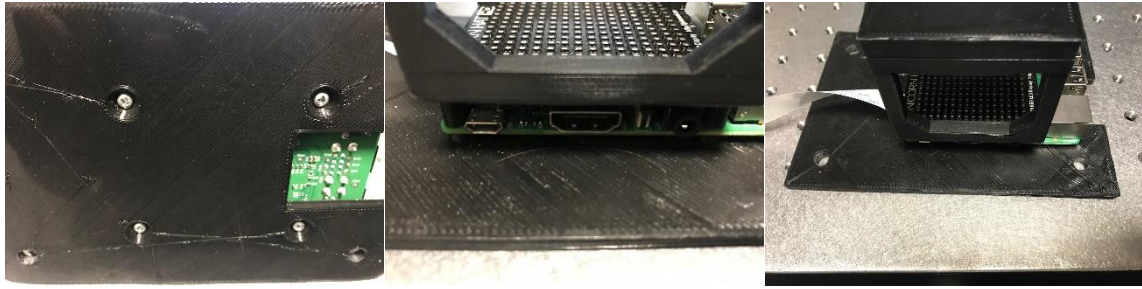

171

## 172 **Operating the Microscope**

### 173 **Installing Software on the Raspberry Pi**

174 Raspbian is a free *Raspberry Pi* operating system available for download from the  
175 [manufacturer's website](#). It can be installed by following the guide listed in the *Links*  
176 section.

177 The various interfaces of the Raspberry Pi can be enabled by going to  
178 Applications Menu -> Preferences -> Raspberry Pi Configuration -> Interfaces, and  
179 then enabling all options.

180 Image acquisition codes can also be downloaded from the *Links* section. Various  
181 python packages will need to be installed before these can be used. The packages  
182 needed are:

- 183 • Unicornhathd
- 184 • Numpy
- 185 • Picamera
- 186 • Matplotlib
- 187 • Io
- 188 • Random
- 189 • Fractions

190 These can be installed using the pip package management system or by installing  
191 anaconda on the raspberry pi. However, the [picamera](#) and [unicornhathd](#) packages are  
192 not included in anaconda and will need to be installed separately. Links to the  
193 installation guides of these packages and a more [general guide](#) to installing python  
194 packages on the Raspberry Pi are provided in the *Links* section. Python2 is used for  
195 image acquisition so follow instructions for Python2.7 as opposed to Python3.

196 We have also provided a cloned Raspberry Pi image which can be cloned onto  
197 an SD card:  
198 <https://drive.google.com/open?id=1Z59lnhNKuGGGVIF1KtoCw2bAcdZESKBo>. You  
199 can download it and clone onto an SD card by following this tutorial  
200 <https://beebom.com/how-clone-raspberry-pi-sd-card-windows-linux-macos/>. The  
201 cloned image contains image capture codes and all the required packages pre-  
202 installed for easy plug-and-play operation of the microscope.

### 203 **Data Acquisition**

- 204 1. Connect the Raspberry Pi to a keyboard, mouse and monitor, and turn it on.
- 205 2. Place the sample on the top plate of the sample stage, underneath the  
206 camera mount.

- 207 3. Use the "Focusing" script to make sure the sample is positioned correctly and  
208 in focus. This script has an option to zoom that can be used if needed. To  
209 focus the microscope, use an Allen key to turn the screw in the focusing  
210 stage.
- 211 4. Close the preview and open the "main data acquisition" file.
- 212 5. Adjust the necessary parameters in the data acquisition file and save the file.
- 213 6. Place the microscope in a dark room or cover it, being careful to ensure the  
214 sample is not moved and the focus is not shifted.
- 215 7. Run the data acquisition script.
- 216 8. Switch off the Raspberry Pi after data acquisition is complete.

## 217 Data transfer

218 The captured data can be copied by a USB drive or the SD card on the *Pi* can  
219 be inserted into a PC and *disk internals Linux reader* can be used to copy the data.  
220 Data can also be transferred through the internet or an Ethernet cable. One possible  
221 approach is by transferring files using a file transfer protocol (FTP)  
222 [https://www.dexterindustries.com/howto/how-to-transfer-files-to-your-raspberry-pi-](https://www.dexterindustries.com/howto/how-to-transfer-files-to-your-raspberry-pi-from-a-pc-computer/)  
223 [from-a-pc-computer/](https://www.dexterindustries.com/howto/how-to-transfer-files-to-your-raspberry-pi-from-a-pc-computer/). Another approach is to transfer files to a cloud storage location  
224 (e.g. OneDrive or Dropbox) and retrieve the files with another computer.

225

## 226 Links

- 227 • Data acquisition codes and CAD files:  
228 <http://dx.doi.org/10.5525/gla.researchdata.594>
- 229 • *Raspbian* installation guide:  
230 [https://www.raspberrypi.org/documentation/installation/installing-](https://www.raspberrypi.org/documentation/installation/installing-images/README.md)  
231 [images/README.md](https://www.raspberrypi.org/documentation/installation/installing-images/README.md)
- 232 • Needs Etcher software to install Raspbian on the SD Card
- 233 • But first, download the Raspbian image from the above link.
- 234 • Guide to Installing *Python Packages* on *Raspberry Pi*:  
235 <https://www.raspberrypi.org/documentation/linux/software/python.md>
- 236 • *Picamera* installation guide: <https://picamera.readthedocs.io/en/release-1.13/>
- 237 • *UnicornHatHD* installation guide: [https://www.github.com/pimoroni/unicorn-](https://www.github.com/pimoroni/unicorn-hat-hd)  
238 [hat-hd](https://www.github.com/pimoroni/unicorn-hat-hd)
- 239 • *Pimoroni Unicorn HD* LED array: [https://shop.pimoroni.com/products/unicorn-](https://shop.pimoroni.com/products/unicorn-hat-hd)  
240 [hat-hd](https://shop.pimoroni.com/products/unicorn-hat-hd)
- 241 • *Raspberry Pi V2.1* camera: [https://www.raspberrypi.org/products/camera-](https://www.raspberrypi.org/products/camera-module-v2/)  
242 [module-v2/](https://www.raspberrypi.org/products/camera-module-v2/)
- 243 • *DiskInternals Linux Reader* can be used to read the files on a Linux SD card  
244 from a computer: <https://www.diskinternals.com/linux-reader/>
- 245 • Installing a cloned Raspberry Pi image to an SD card:  
246 <https://beebom.com/how-clone-raspberry-pi-sd-card-windows-linux-macos/>
- 247 • Raspberry Pi cloned image used for this microscope:  
248 <https://drive.google.com/open?id=1Z59lnhNKuGGVIF1KtoCw2bAcdZESKB>  
249 [o](https://drive.google.com/open?id=1Z59lnhNKuGGVIF1KtoCw2bAcdZESKB)



## 251 Supplementary material 2: 252 Reconstructions from the simulations

253 Simulations were carried out to compare the reconstruction quality from the  
254 sparsely sampled Bayer filtered images using (1) standard FPM algorithms on  
255 demosaiced images and (2) sparsely sampled FPM reconstruction on raw Bayer data.  
256 These reconstruction methods were applied to investigate their performance for  
257 various sampling and frequency overlap criteria. Simulations for a non-Bayer image  
258 sensor (monochrome) are also presented to provide a reference for the results  
259 obtained from a Bayer filtered image sensor (colour). Results are shown in  
260 Supplementary Figure S2 1, Supplementary Figure S2 2, Supplementary Figure S2 3.  
261 These are the reconstructed images for data points displayed in the graphs presented  
262 in Figure 2 of the main manuscript.

263

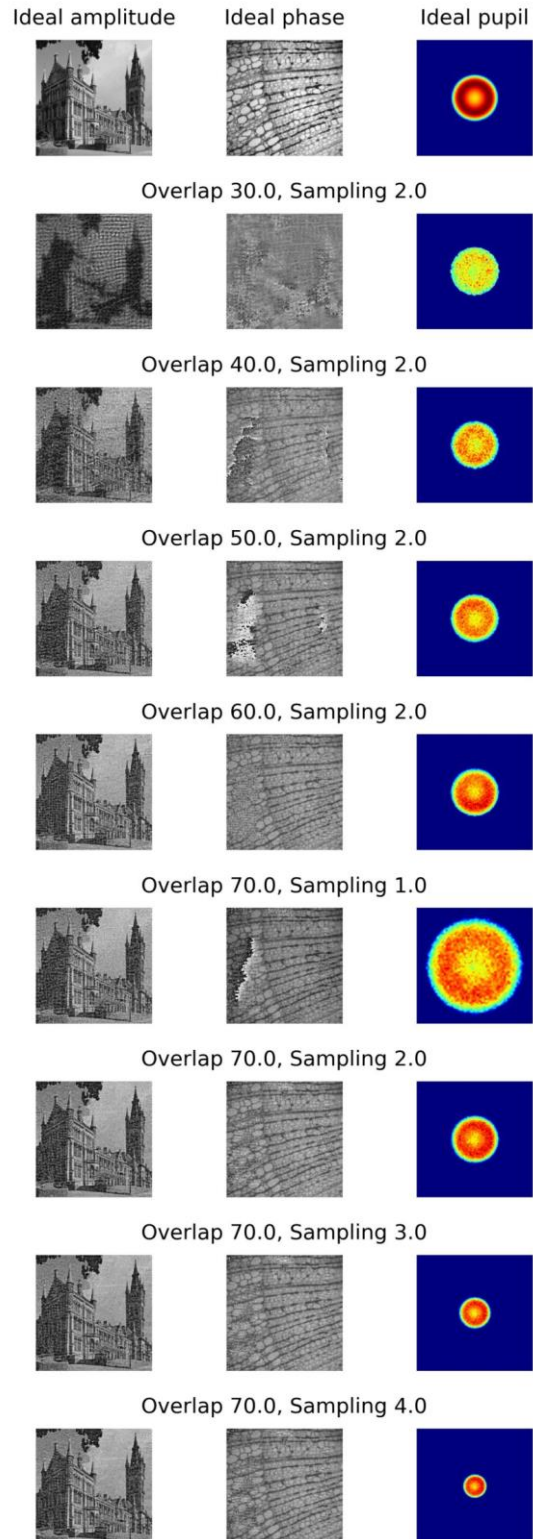

Supplementary Figure S2 1 Reconstructions from images obtained with a monochrome sensor (no Bayer filter) using the standard FPM algorithm. First row shows the expected ideal reconstruction and the remaining rows shows the reconstructions from datasets captured with (1) various image sampling criteria and (2) overlap between the spatial frequencies captured by any two adjacent illumination angles. Noise and aberrations are added in the simulated images to mimic the experimental conditions.



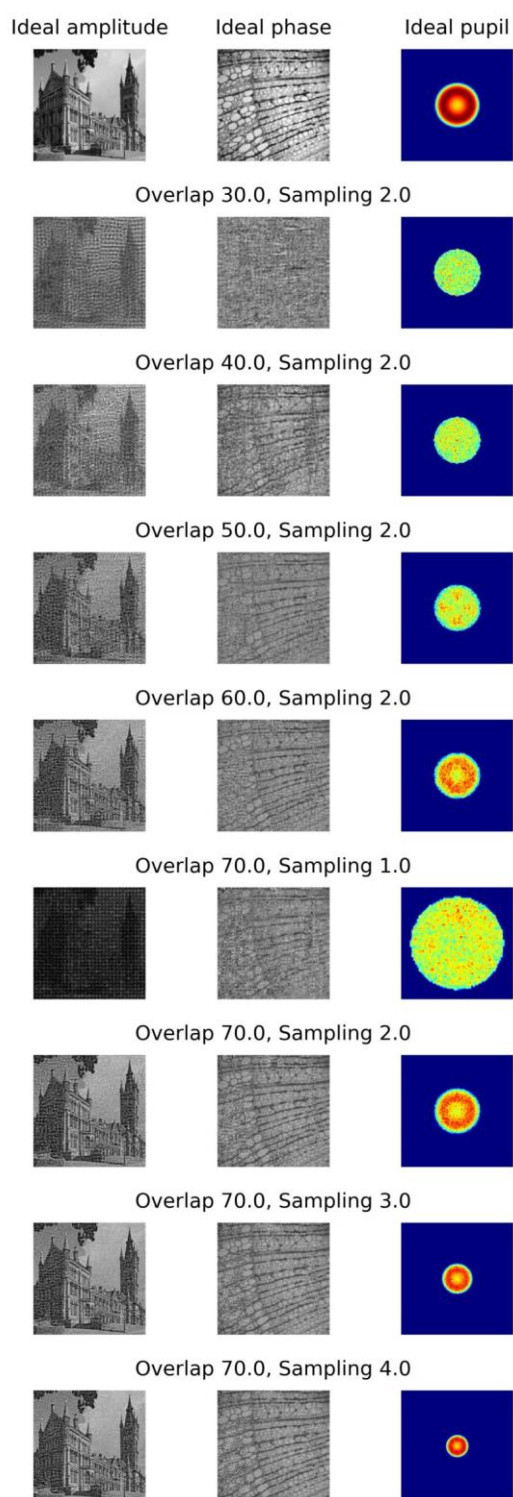

Supplementary Figure S2 2 Reconstructions from images obtained with a color sensor (with Bayer filter array) using the sparsely-sampled FPM algorithm. These images are sparse due to the intermittent sampling from the Bayer filter array. First row shows the expected ideal reconstruction and the remaining rows shows the reconstructions from datasets captured with (1) various image sampling criteria and (2) overlap between the spatial frequencies captured by any two adjacent illumination angles. Noise and aberrations are added in the simulated images to mimic the experimental conditions.

Ideal amplitude

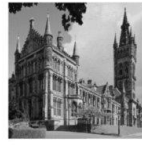

Ideal phase

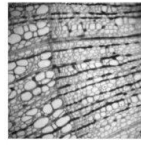

Ideal pupil

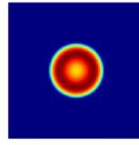

Overlap 30.0, Sampling 2.0

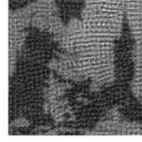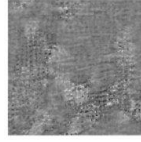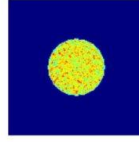

Overlap 40.0, Sampling 2.0

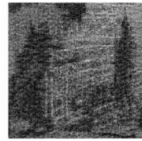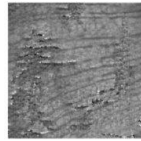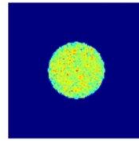

Overlap 50.0, Sampling 2.0

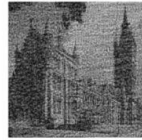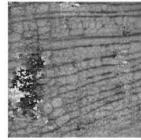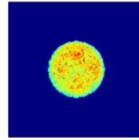

Overlap 60.0, Sampling 2.0

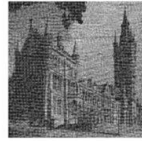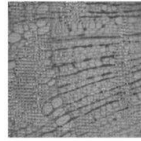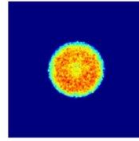

Overlap 70.0, Sampling 1.0

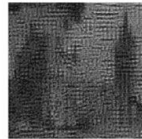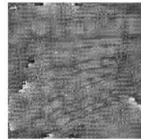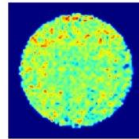

Overlap 70.0, Sampling 2.0

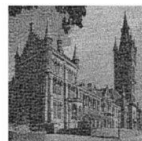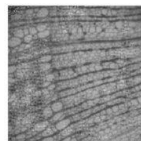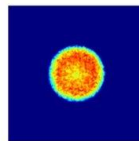

Overlap 70.0, Sampling 3.0

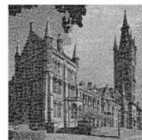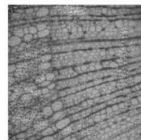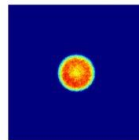

Overlap 70.0, Sampling 4.0

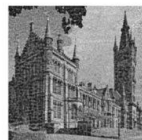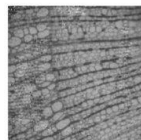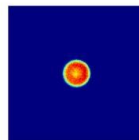

Supplementary Figure S2 3 Reconstructions from images obtained with a color sensor (with Bayer filter array) using the standard FPM algorithm after demosaicing. The sparse images captured from the Bayer filter array are demosaiced (bilinear interpolation) such that the standard FPM algorithm can be implemented. First row shows the expected ideal reconstruction and the remaining rows shows the reconstructions from datasets captured with (1) various image sampling criteria and (2) overlap between the spatial frequencies captured by any two adjacent illumination angles. Noise and aberrations are added in the simulated images to mimic the experimental conditions.
